# Supplementary material
Source: publisher figshare collection journal article supplement (https://acs.figshare.com/ndownloader/files/3849307)
Supplement: Supplementary file 1 [file 3849307]

# **$\beta$ -Cyclodextrin Functionalized Magnetic Mesoporous Silica Colloid for Cholesterol Separation**

*Arjyabaran Sinha, SK Basiruddin,<sup>#</sup> Atanu Chakraborty and Nikhil R. Jana\**

Centre for Advanced Materials, Indian Association for the Cultivation of Science, Kolkata-  
700032, India

\*Corresponding author. E-mail: [camnrj@iacs.res.in](mailto:camnrj@iacs.res.in)

Telephone: +91-33-24734971. Fax: +91-33-24732805

<sup>#</sup>Present address: Department of Chemistry, Veer Surendra Sai University of Technology, Burla,  
Sambalpur-768018, India.

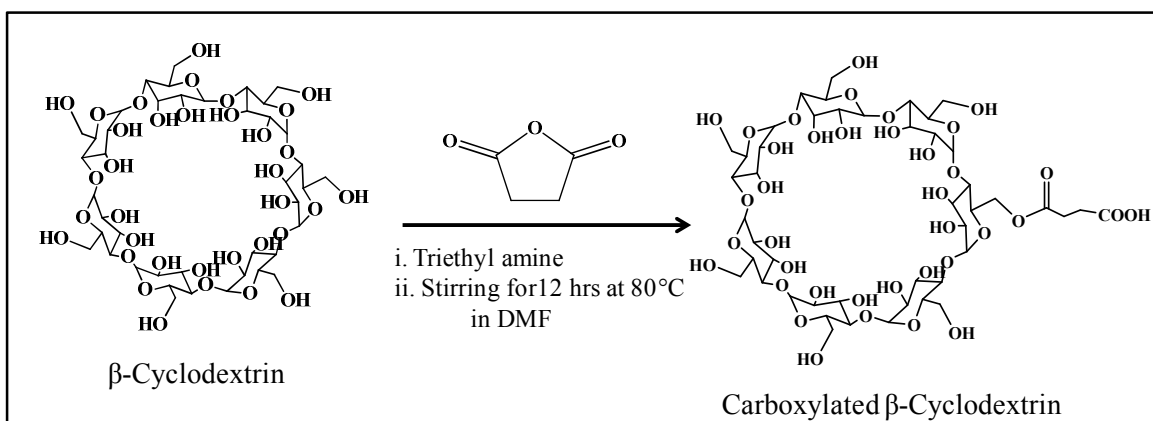

**Scheme S1.** Equation for synthesis of carboxylated  $\beta$ -cyclodextrin from  $\beta$ -cyclodextrin.

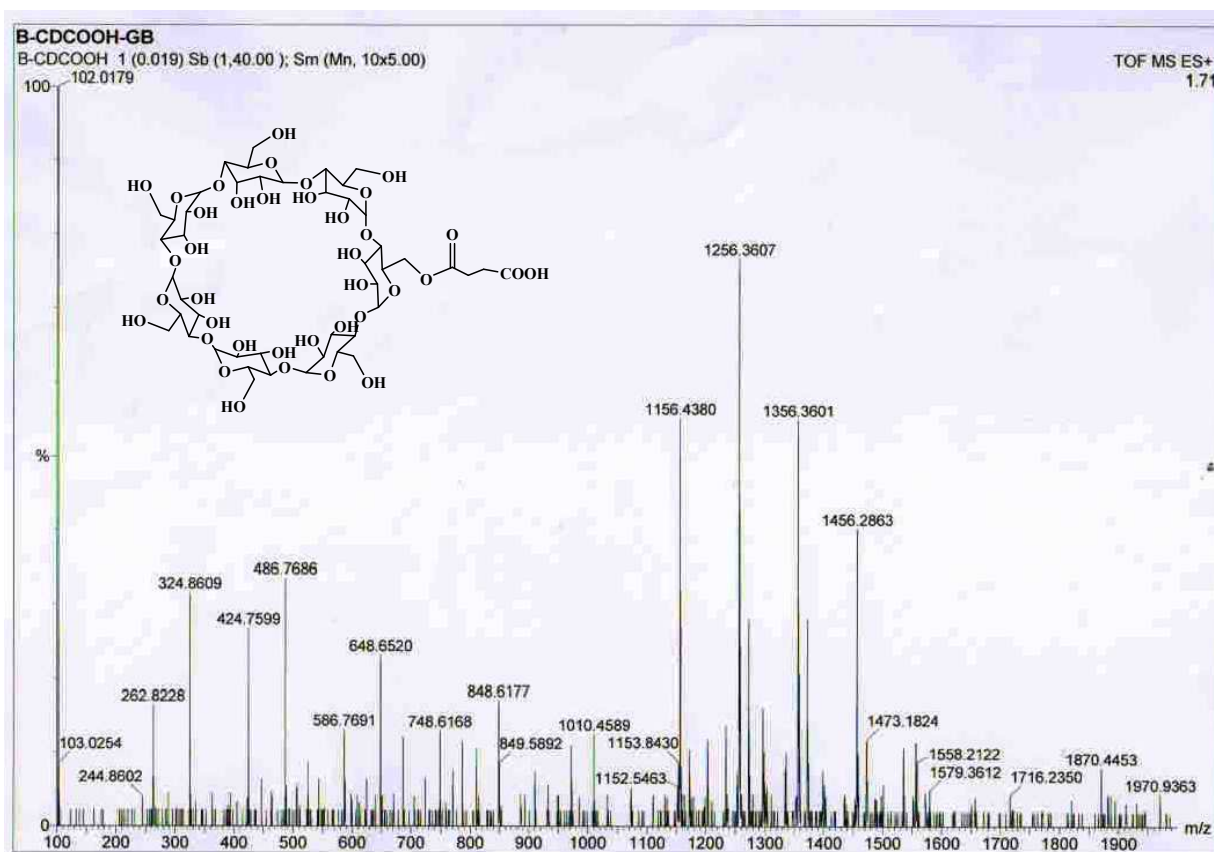

**Figure S1.** HRMS of carboxylated  $\beta$ -cyclodextrin. The peak at 1256.3607 attributed due to monocarboxylated  $\beta$ -cyclodextrin [Calcd. for  $\text{C}_{46}\text{H}_{73}\text{O}_{38}\text{Na}$  is 1256.3678; found: 1256.3607]. The peaks at  $m/z$  1356.3601, 1456.2863 attributed due to di- and tri-carboxylated  $\beta$ -cyclodextrins, respectively. The peak at 1156.4380 appears due to  $\beta$ -cyclodextrin.

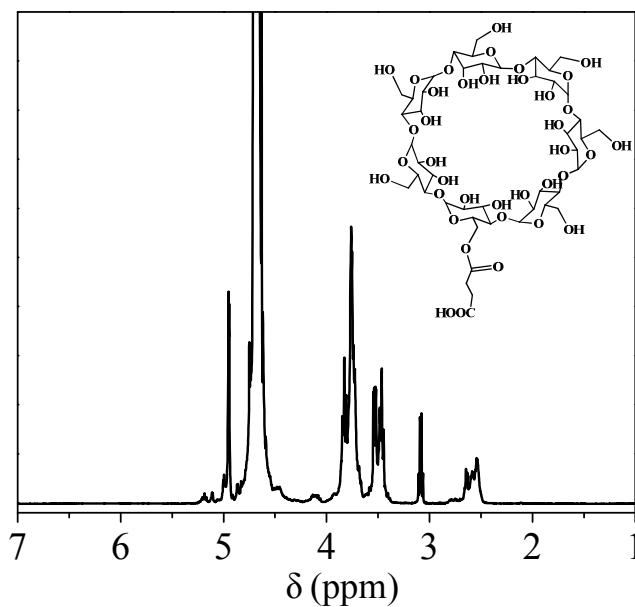

**Figure S2.**  $^1\text{H}$  NMR spectrum of carboxylated  $\beta$ -cyclodextrin in  $\text{D}_2\text{O}$ . Peaks at 2.5 and 2.6 ppm are due to the proton of methylene group of succinic acid moiety of carboxylated  $\beta$ -cyclodextrin and peaks in the region of 3 to 5 are due to the  $\beta$ -cyclodextrin moiety and solvent.

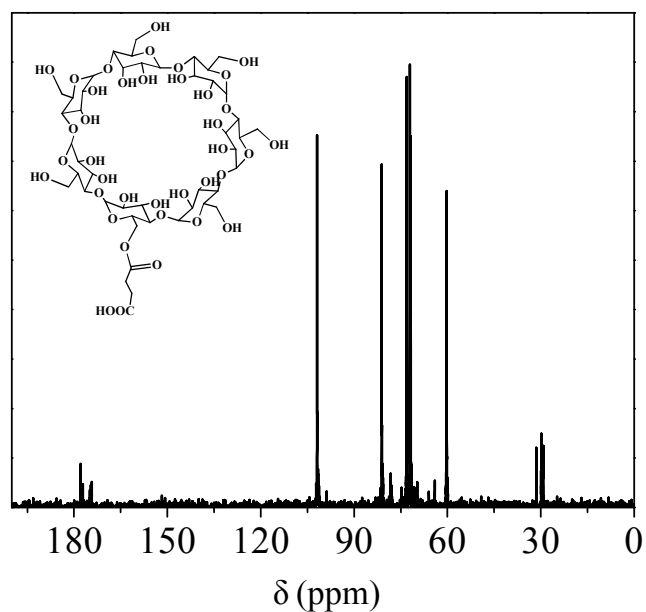

**Figure S3.**  $^{13}\text{C}$  NMR of carboxylated  $\beta$ -cyclodextrin. The peaks between 60 to 100 ppm correspond to the C atoms of  $\beta$ -cyclodextrin, peaks around 174 and 177 ppm attribute to the C atoms of ester group and carboxylic acid groups, respectively. Peaks around 29.2 and 31.4 ppm arise due to the C atoms of methylene groups of carboxylated  $\beta$ -cyclodextrin.

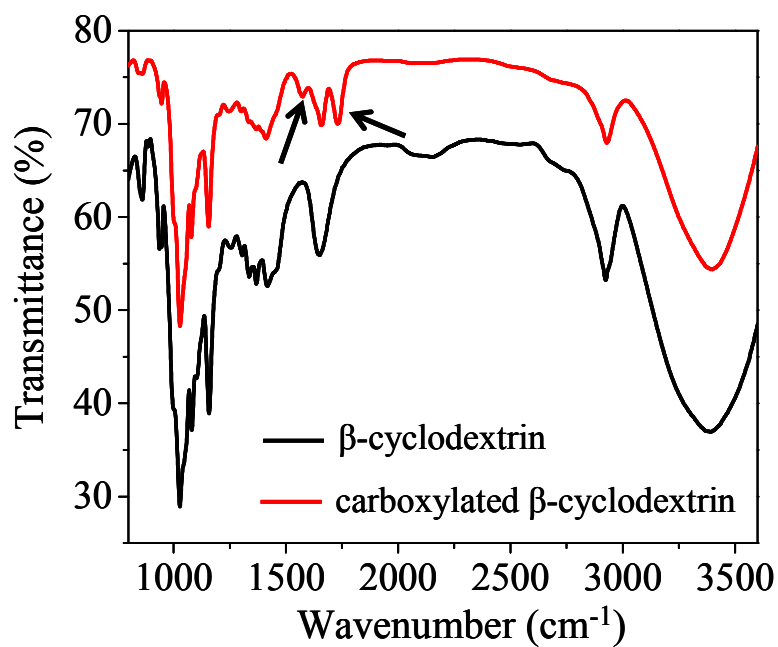

**Figure S4.** FTIR spectra of  $\beta$ -cyclodextrin and carboxylated  $\beta$ -cyclodextrin. Carboxylated  $\beta$ -cyclodextrin shows two new bands at 1730 and 1570  $\text{cm}^{-1}$  (indicated by arrow sign) due to the stretching vibration of C=O and  $-\text{COO}^-$  group, which indicates conjugation with succinic anhydride.

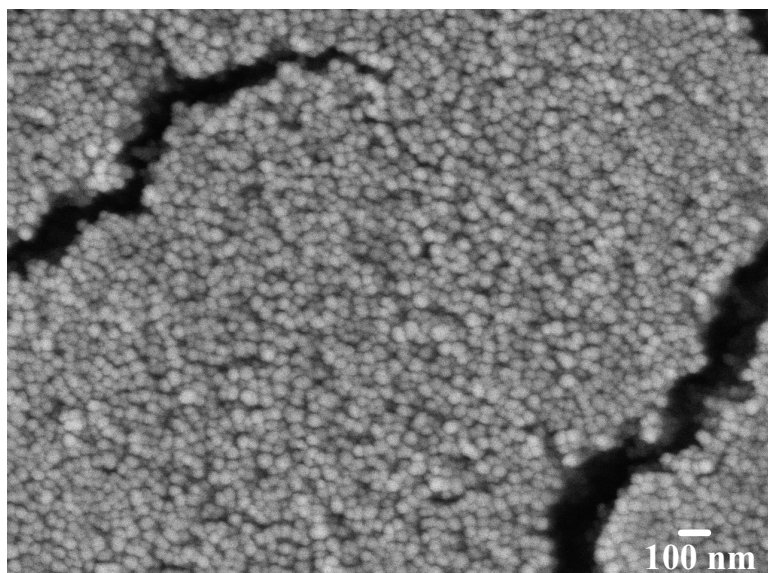

**Figure S5.** Low resolution SEM image of MMS-CD.

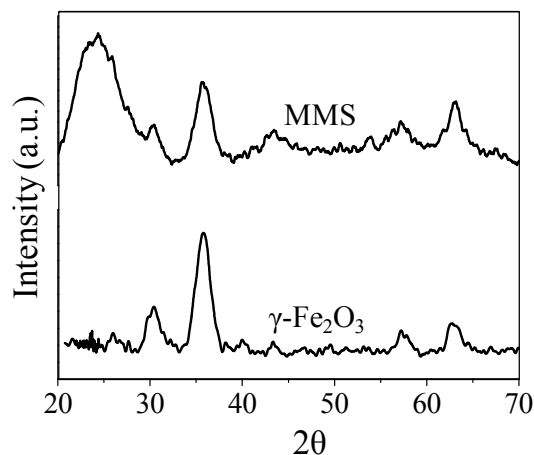

**Figure S6.** XRD pattern of as synthesized  $\gamma\text{-Fe}_2\text{O}_3$  and MMS showing the reflection at  $30^\circ$ ,  $36^\circ$ ,  $43^\circ$ ,  $54^\circ$ ,  $57^\circ$  and  $63^\circ$  corresponding to the plane of (220), (311), (400), (422), (511) and (440) of  $\gamma\text{-Fe}_2\text{O}_3$  phase. Result indicates that  $\gamma\text{-Fe}_2\text{O}_3$  retain its structure inside MMS. The reflection observed at  $23^\circ$  due to the amorphous nature of silica.

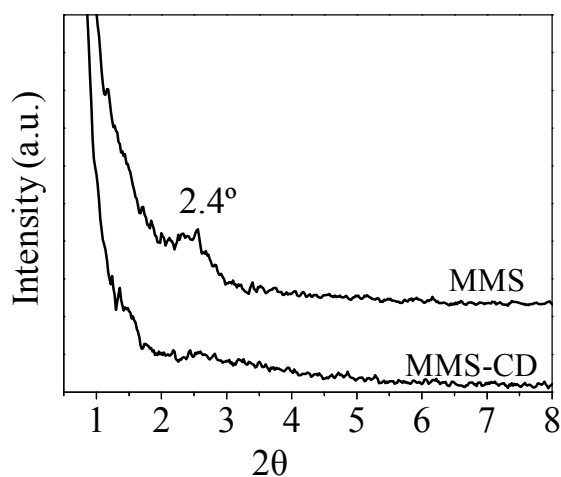

**Figure S7.** Small angle XRD of MMS and MMS-CD. MMS shows peaks at  $2.4^\circ$  but MMS-CD shows broadening of peak in that region, indicating disorder structure due to functionalization.

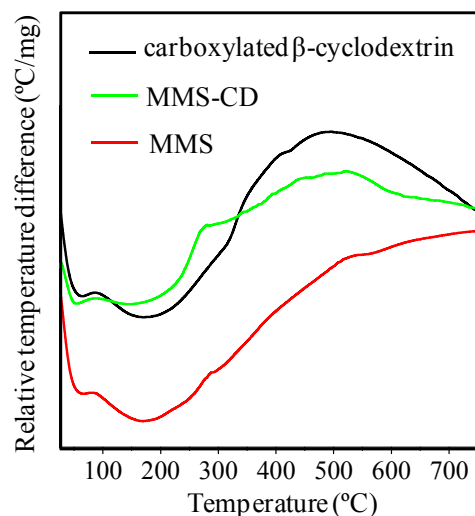

**Figure S8.** Differential thermal analysis (DTA) data of monocarboxylated  $\beta$ -cyclodextrin, MMS-CD and MMS. Results show that monocarboxylated cyclodextrin degrade in the temperature range from 200-700°C. The similar degradation characteristic is also observed in MMS-CD. However, such pattern is absent in MMS.

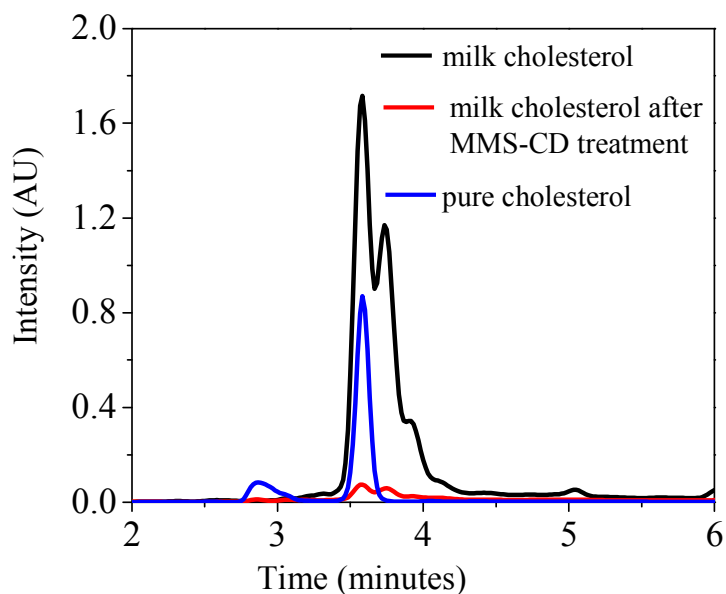

**Figure S9.** Typical chromatogram of pure cholesterol and milk cholesterol before or after treatment with MMS-CD.

**Prussian Blue Test.** For the prussian blue test two vials were taken each of which contain 5 mg cholesterol crystal in 3 mL water. Then in one vial solution of MMS was added and in other vial solution of MMS-CD was added (concentration of MMS/MMS-CD used was 2 mg/mL) and incubated for 4 hrs. Next, the cholesterol crystals were separated and washed with water to remove the unbound particles. Next, 10 % HCl and 10 %  $K_4[Fe(CN)_6]$  solution were added to each vials separately and wait for one hour for the development of blue colour.

**Calculation of Carboxylated  $\beta$ -Cyclodextrin per Gram of MMS-CD.** From TGA data we found  $\sim 10$  wt % of  $\beta$ -cyclodextrin is conjugated to MMS. From this data we assume one gram of MMS-CD contains 0.1 gram of carboxylated  $\beta$ -cyclodextrin (that is  $8.1 \times 10^{-5}$  mole, MW of carboxylated  $\beta$ -cyclodextrin is 1235). Therefore, each gram of MMS-CD contains  $4.88 \times 10^{19}$  number of carboxylated  $\beta$ -cyclodextrin. BET surface area data shows each gram of MMS-CD has surface area of  $160 \text{ m}^2$ . Hence density of  $\beta$ -cyclodextrin is  $3.05 \times 10^{17}$  molecules/ $\text{m}^2$ .
